# Supplementary material for: Pathways and Genes Associated with Immune Dysfunction in Sheep Paratuberculosis
Source: PubMed Central journal article supplement (PMC5402263; doi:10.1038/srep46695), 2017-04-24
Supplement: srep46695-s1.pdf [file srep46695-s1.pdf]

# **Pathways and Genes Associated with Immune Dysfunction in Sheep Paratuberculosis**

**Anton Gossner<sup>1,\*</sup>, Craig Watkins<sup>2</sup>, Francesca Chianini<sup>2</sup>, and John Hopkins<sup>1</sup>**

<sup>1</sup>The Roslin Institute & R(D)SVS, University of Edinburgh, Easter Bush, Midlothian EH25 9RG. U.K.

<sup>2</sup>Moredun Research Institute, International Research Centre, Pentlands Science Park, Penicuik, Midlothian EH26 0PZ, UK

\*Corresponding author: [a.gossner@ed.ac.uk](mailto:a.gossner@ed.ac.uk)

**Supplementary Table S1. Breed, age, histopathology and disease diagnosis of sheep.**

<sup>1</sup>SGI (Severity of Granulomatous Inflammation) grading; based on both total numbers of epithelioid macrophages and leukocyte distribution patterns of the terminal ileum tissue. Scoring of lymphocytes and large macrophages based on in house scoring system.

<sup>2</sup>AFB (Acid Fast Bodies) grading; grades 0-2 were defined as paucibacillary; grades 3-4 were defined as multibacillary observed in terminal ileum tissue. Scoring of histopathological observations based on a modified version of Dennis *et al.*, 2011.

<sup>3</sup>Tissue specific lesion grading: for each histological section, the sum of the points (SGI and AFB) was used to determine tissue-specific lesion grades. A severity of “none” was assigned to those with a lesion grade of 0, “mild” was assigned to a lesion grade of  $\geq 2$  and  $\leq 3$ , “moderate” was assigned to those with a lesion grade of  $>3$  and  $\leq 5$  and “severe” was assigned to a lesion grade of 6 to 11.

<sup>4</sup>IS900 PCR result of ICLN using each of the two primer sets (see methods).

<sup>5</sup>Diagnosis was based on histopathological observations.

| Sheep ID | Breed                     | Age (yrs) | SGI <sup>1</sup> | AFB <sup>2</sup> | SGI <sup>1</sup>      | AFB <sup>2</sup> | Tissue specific lesion grade <sup>3</sup> | IS900 <sup>4</sup> | Diagnosis <sup>5</sup> |
|----------|---------------------------|-----------|------------------|------------------|-----------------------|------------------|-------------------------------------------|--------------------|------------------------|
|          |                           |           | Terminal ileum   |                  | Mesenteric lymph node |                  |                                           |                    |                        |
| S01      | Blackface                 | 3         | 5                | 4                | 3                     | 3                | Severe                                    | +, +               | Multibacillary         |
| S02      | Blackface                 | 3         | 7                | 4                | 4                     | 1                | Severe                                    | +, +               | Multibacillary         |
| S03      | Blackface x Bleu du Maine | 2.5       | 5                | 4                | 3                     | 3                | Severe                                    | +, +               | Multibacillary         |
| S04      | Blackface                 | 4.5       | 6                | 4                | 3                     | 2.5              | Severe                                    | +, +               | Multibacillary         |
| S05      | Blackface                 | 3         | 5                | 4                | 2                     | 0                | Severe                                    | +, +               | Multibacillary         |
| S06      | Texel X Blackface         | 2.5       | 2.5              | 0                | 1.5                   | 0                | mild                                      | +, +               | Paucibacillary         |
| S07      | Blackface X               | 2         | 3                | 0                | 3                     | 0                | mild                                      | +, +               | Paucibacillary         |
| S08      | Blackface                 | 3         | 2                | 0                | 1                     | 0                | mild                                      | +, +               | Paucibacillary         |
| S09      | Blackface X Bleu Du Maine | 4         | 4                | 1                | 0                     | ND               | moderate                                  | +, +               | Paucibacillary         |
| S10      | Blackface                 | 4         | 2                | 0                | 3                     | 0                | mild                                      | +, +               | Paucibacillary         |
| S11      | Blackface                 | 2.5       | 0                | 0                | 0                     | 0                | ND                                        | -, -               | Control                |
| S12      | Blackface                 | 2.5       | 0                | 0                | 0                     | 0                | ND                                        | -, -               | Control                |
| S13      | Blackface                 | 2.5       | 0                | 0                | 0                     | 0                | ND                                        | -, -               | Control                |
| S14      | Blackface                 | 2.5       | 0                | 0                | 0                     | 0                | ND                                        | -, -               | Control                |
| S15      | Blackface                 | 2.5       | 0                | 0                | 0                     | 0                | ND                                        | -, -               | Control                |

**Supplementary Table S2. Summary of TruSeq reads.** Each group of samples contained five biological replicates, a total of fifteen samples. The total number of raw TruSeq reads for each sample before adapter and quality trimming (raw reads) are listed. The number of paired-end reads that uniquely mapped to *Ovis aries* genome (Oar v3.1) or mapped to multiple locations, using the STAR universal RNA-seq aligner, are shown for each sample.

| Sample ID | Raw reads  | Mapped reads | Uniquely mapped | Multi-mapped |
|-----------|------------|--------------|-----------------|--------------|
| S01       | 59,241,736 | 29,097,947   | 22,877,614      | 1,626,475    |
| S02       | 48,256,756 | 23,777,024   | 19,756,787      | 1,536,976    |
| S03       | 65,883,060 | 32,388,696   | 26,963,946      | 1,912,690    |
| S04       | 47,183,418 | 23,173,313   | 17,251,118      | 1,078,380    |
| S05       | 43,669,754 | 21,565,568   | 17,330,188      | 1,245,233    |
| S06       | 52,484,160 | 25,829,085   | 21,439,174      | 1,704,987    |
| S07       | 46,415,776 | 22,833,562   | 19,159,643      | 1,417,101    |
| S08       | 66,806,790 | 32,895,819   | 26,680,877      | 1,798,492    |
| S09       | 63,820,978 | 27,371,069   | 22,113,340      | 1,667,006    |
| S10       | 40,038,062 | 16,799,479   | 13,863,765      | 1,124,413    |
| S11       | 71,188,368 | 35,186,648   | 30,411,641      | 2,157,533    |
| S12       | 47,053,260 | 23,081,729   | 20,139,973      | 1,559,921    |
| S13       | 54,778,442 | 27,064,142   | 23,343,990      | 1,751,351    |
| S14       | 90,890,678 | 31,484,644   | 26,973,854      | 1,991,479    |
| S15       | 43,495,924 | 21,475,087   | 18,518,341      | 1,257,989    |

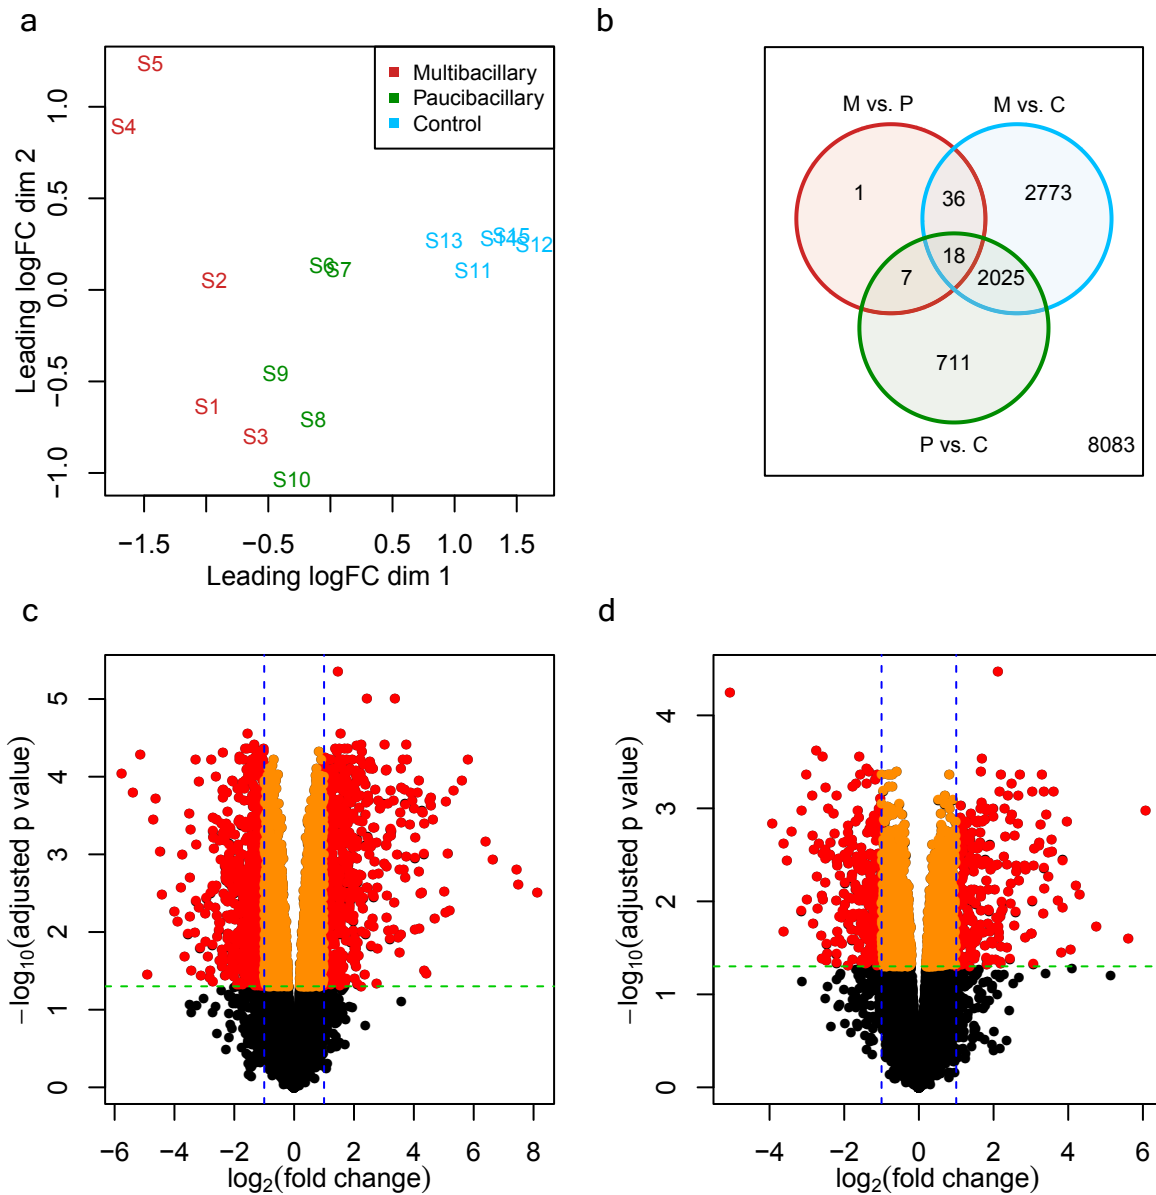

Supplementary Figure S1: Transcriptome changes in the ICLN upon paratuberculosis infection. Multidimensional scaling (MDS) and volcano plots, showing separation of MAP infected and control groups and a summary of overall differential gene expression between groups. (a) Multidimensional scaling (MDS) plot of all samples. The top 500 genes for each pair of samples were used to calculate the pairwise distances on the plot. Distances were computed from the  $\log_2$ -cpm values using the plotMDS function in the limma package. (b) Venn diagram showing the overlap of significantly DEG between the all comparisons. Volcano plots showing multibacillary versus control sheep (c) and paucibacillary versus control (d) overall DEG. The red points represent significantly DEG with fold-changes  $> \pm 2$  (x-axis) and orange points are significantly DEG but with a fold-change  $< \pm 2$ . The dashed green-line shows the significant cut-off, with points above the line having adjusted p-value  $< 0.05$  and points below the line having adjusted p-value  $> 0.05$ . The vertical dashed blue lines marks the  $\pm 2$  fold-change demarcation.

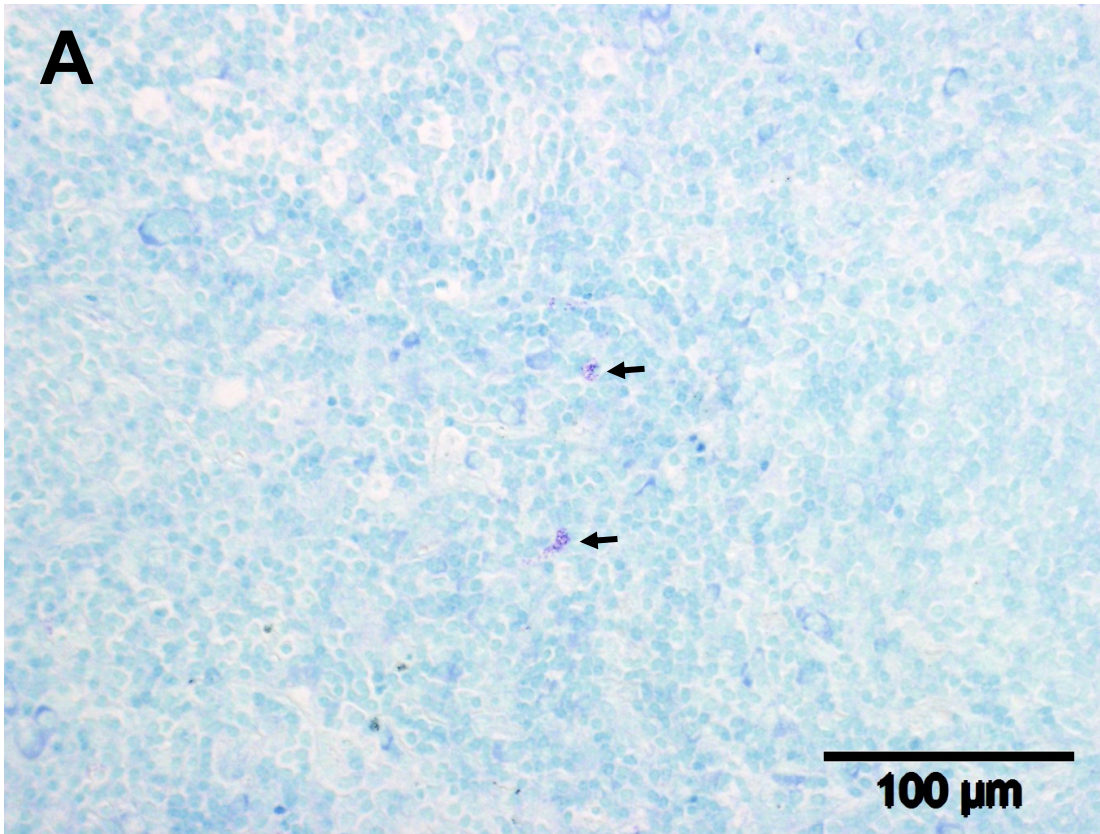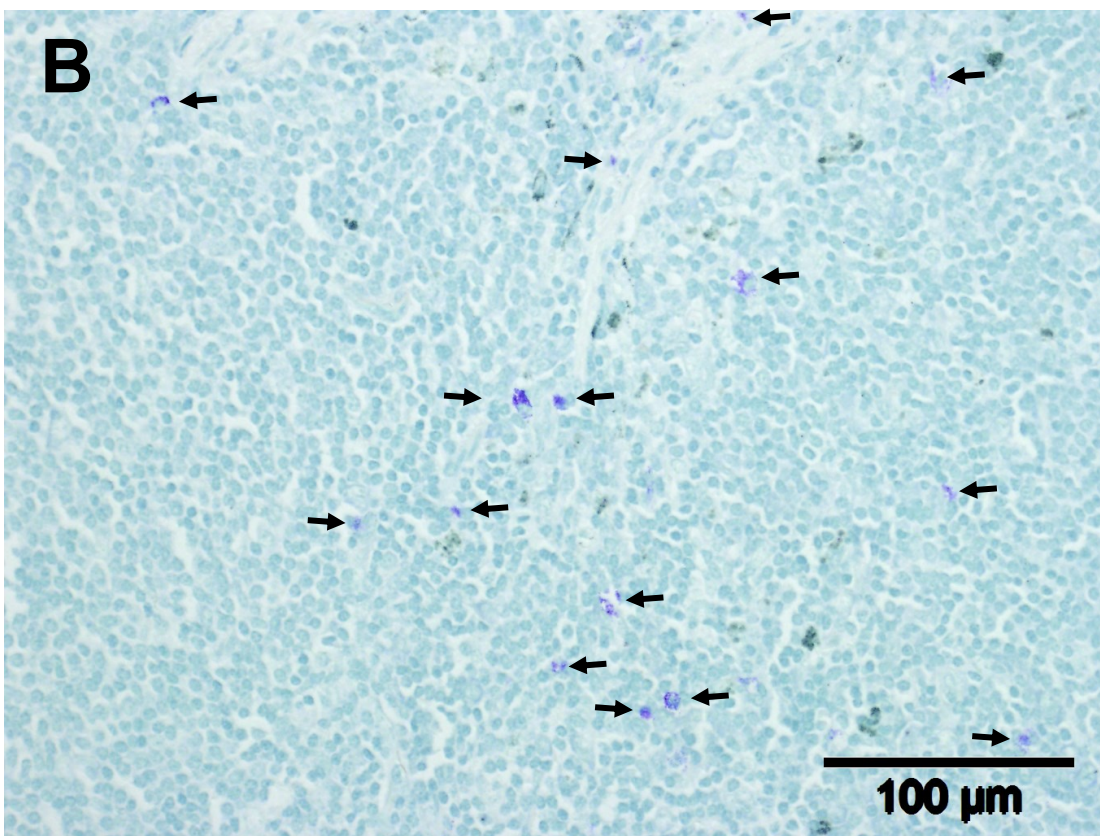

**Supplementary Figure S2.** Toluidine blue stained sections of ICLN from multibacillary (A) and uninfected control (B) sheep. Arrows highlight mast cells.

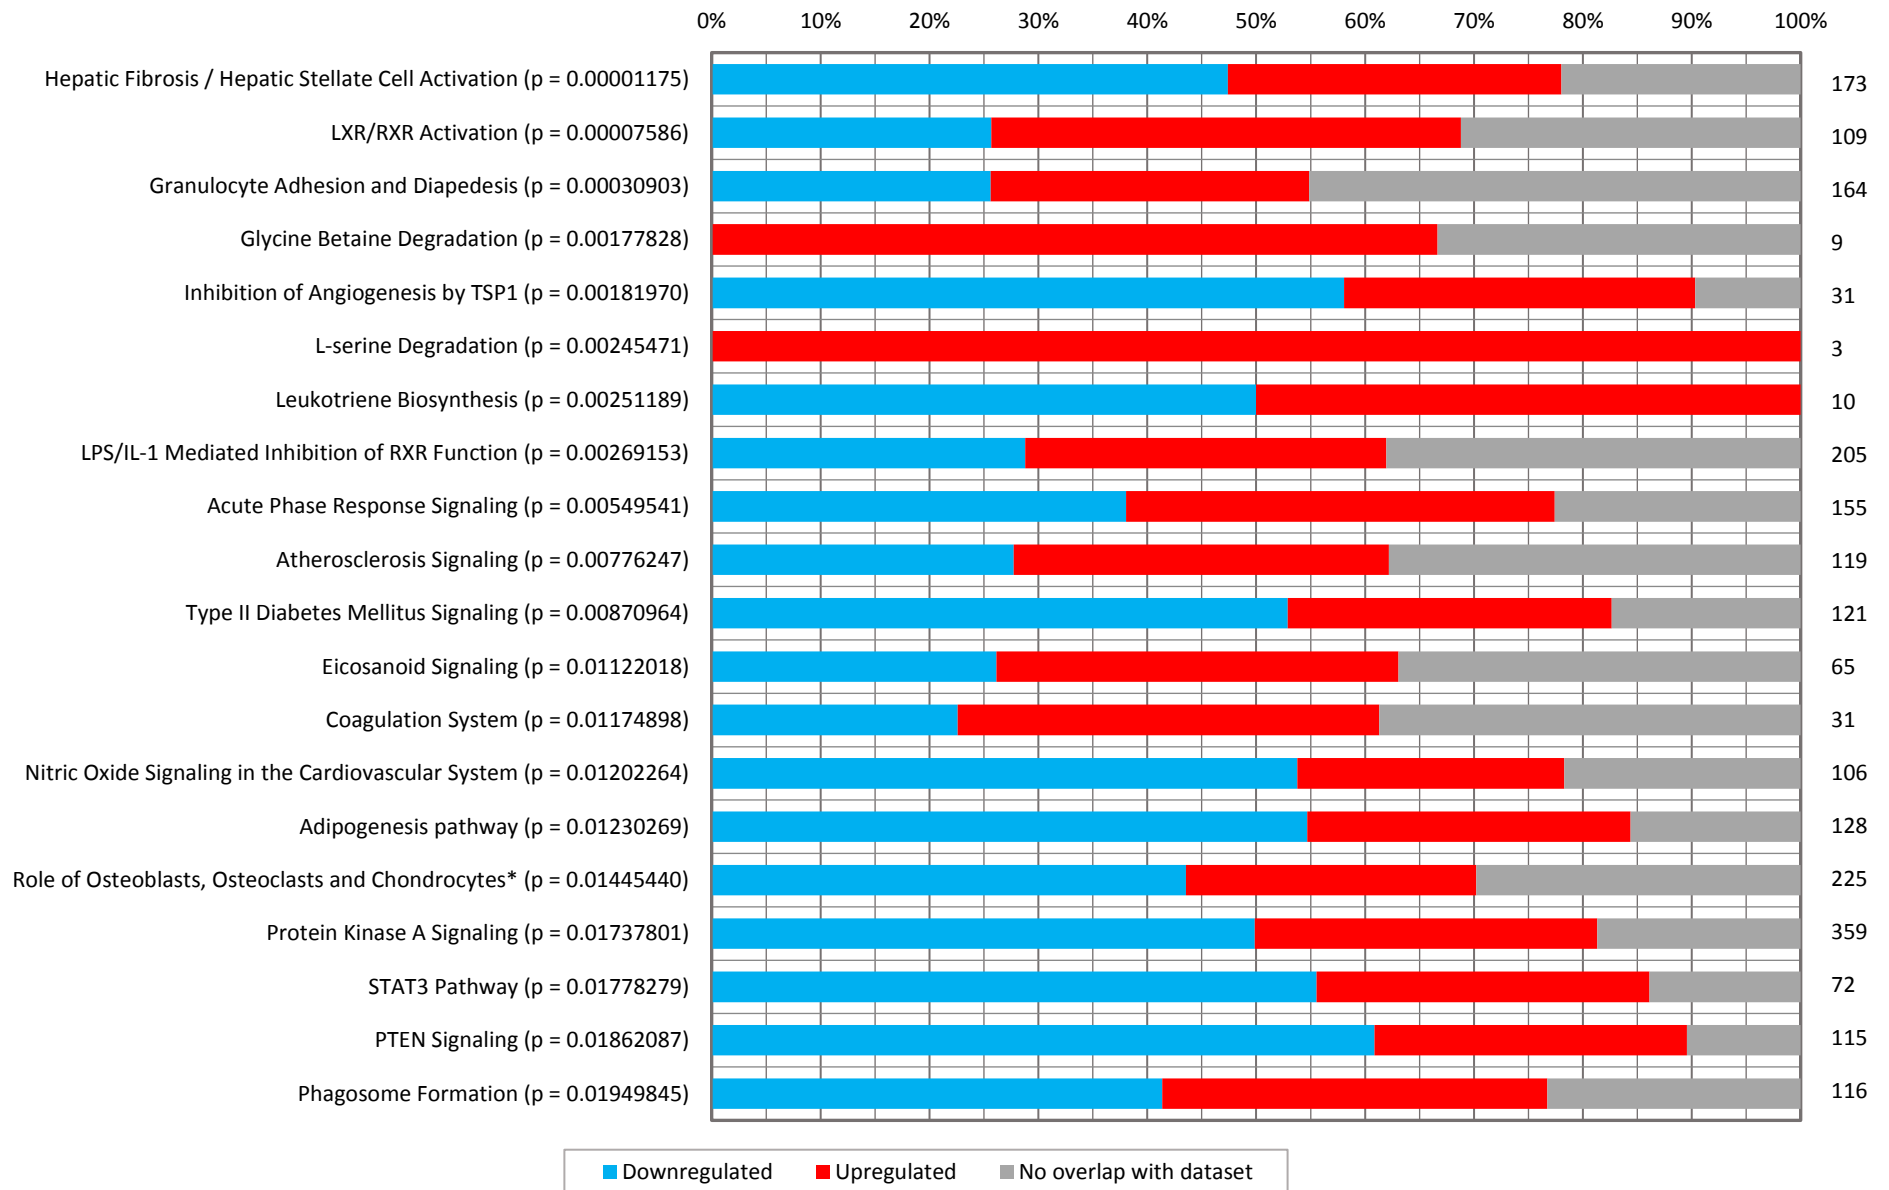

**Supplementary Figure S3: Pathway Analysis of Differentially Expressed Genes of the ICLN in Multibacillary Paratuberculosis.** The top twenty canonical pathways enriched for differentially expressed genes identified in the P versus C dataset are displayed along the y-axis, the significance values (shown in brackets) were calculated by Fisher's exact test right-tailed in IPA. The percentage of DE genes for down and up-regulated genes within the canonical pathway are shown on the x-axis and total number of genes in the pathway is displayed to the right of each of the stacked bars. (\*in Rheumatoid Arthritis)
